# Supplementary material for: Shotgun Proteomics-based distinctive fingerprint of buffalo sperm surface unravels over-representation of proteins driving spermatogenesis, motility, and fertility
Source: Research Square preprint supplement (doi:10.21203/rs.3.rs-2163530/v1), 2022-10-27
Supplement: Supplementary file 1 [file fed74b28f6599c6fc657a576.docx]

**Antibody development for determining the most antigenic buffalo sperm-surface protein**

The mixture of proteins isolated from the salt extraction (2X-DPBS) was used to identify the most antigenic protein present on the sperm surface amongst these proteins. This is because many of the epididymal and seminal plasma acquired proteins are required to traverse the FRT successfully in accordance with the “last-in, first-out” functional hierarchy (**Tecle-REF**). The salt extracted proteins (100µg, 1µg/mL) mixed with equal volume (100µL) of Freund’s complete adjuvant were administered slowly via intra-peritoneum route to the female nulliparous Wistar rats (N=2) of similar body weight (~150g) and age (2 animals per cage). The pre-immune sera (Control) were extracted from the blood taken from the eye of the animal by a skilled technician in the presence of a veterinary doctor. The booster doses comprising 100µL of the antigen (salt extracted proteins, 0.75µg/ml) was thoroughly mixed with an equal volume of Freund’s incomplete adjuvant and administered similarly to the initial immunization. The first booster dose was administered after 15 days from the day of initial immunization dose. The antibody titer was checked using western blot and three booster doses were deemed necessary to obtain working IgGs isolated from the serum. The whole blood (2-3mL) was collected from the aorta of the euthanized animals. The animals were euthanized by cervical dislocation by trained individuals in the presence of a veterinary doctor. The spinal cord was dislocated rapidly from the brain stem and the animals were assessed for separation of cervical vertebrae, loss of consciousness and indications of death. The blood was allowed to clot at the RT and the clot was removed by centrifugation at 1500 x g for 12 minutes in a refrigerated centrifuge. The supernatant obtained as the liquid component was immediately transferred into a clean polypropylene tube using a Pasteur pipette. The samples were maintained at 4°C while handling and if the serum was not analyzed immediately, the serum was apportioned into 0.5 ml aliquots and stored at –80°C for later use. The protein G-based NAb™ Spin Kits (based on affinity purification) were used for isolation of IgG antibodies from the collected serum according to the manufacturer’s instructions. The subsequent quantification of the isolated IgG antibodies from the serum was performed by measuring the A280 of each eluate fraction on an Infinite® 200 NanoQuant microplate reader (Tecan). A confirmatory SDS-PAGE was performed to validate the isolated IgGs. The isolated antibody was used to probe the salt extracted proteins using western blot as described above. The blots were incubated with the *in house* raised rat anti-sperm-surface polyclonal antibodies (1:20000 dilution) and later probed with HRP conjugated secondary antibody, HRP-labeled anti-rat IgG (1:50,000 dilution; Sigma Aldrich). The detection and acquisition of immunoreaction signals were captured as described previously.


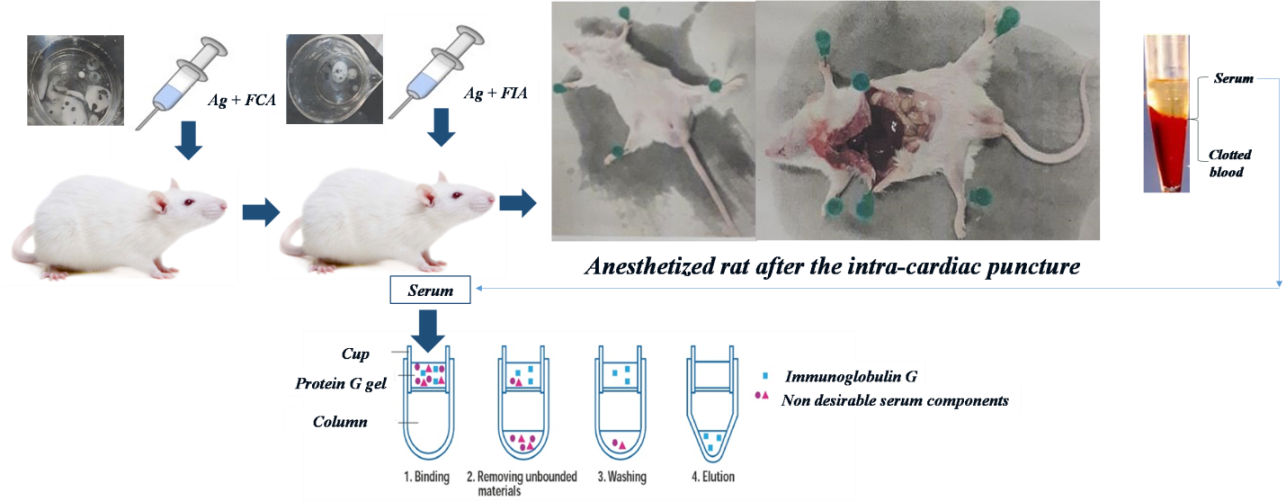


**Fig.**

**Band cutting and protein extraction**

a) Band de-staining and trypsinization

Briefly, the coomassie stained gel was rinsed with water and placed on a glass plate (glass plate and the scalpel were washed with 70% alcohol) and the gel bands of interest were cut and put in a micro-centrifuge tube (MCT). To remove the stain, 100μl of 40mM ABC (ammonium bi-carbonate, NH4HCO3) and 100 μl of 40% ACN (Acetonitrile) (CH3CN) were added to every MCT. After complete de-staining, the mixture was spun briefly and the supernatant was removed with a microtip. Thereafter, 100μl of 100% ACN was added for dehydration of the gel and incubated for 15 min. at room temperature (RT). Subsequently, 100μl of freshly prepared alkylation solution i.e. 20mM IAA (iodoacetamide) in 40mM ABC was added and incubated for 10 min at room temp in dark. The IAA was then removed and later 100μl of 100% ACN was added and was made sure that the volume submerged the gel pieces completely and incubated again for 15 min. The 100% ACN was then removed, and freshly prepared 50mM ABC buffer was added, containing 12.5ng/μl of sequencing-grade modified Trypsin. Only stipulated amount of Trypsin solution sufficient to cover the gel pieces (about 30-40 μl ) was added and the tubes were incubated in ice for 45 min to re-swell the gel pieces after which 40mM ABC, adequate to cover gel pieces, was added and incubated overnight at 37°C.

b) Peptide extraction

The tubes were brought at room temperature (RT) and 100 μl of 5% formic acid was added to each tube and incubated for 10 min at 37°C. The tubes were spun down and the supernatant was transferred to a fresh tube to which 100 μl of extraction buffer (5% formic acid in 40% ACN) was added and incubated for 10 min on a shaker. The tubes were again spun and the supernatants were pooled with the supernatant from the previous step. Finally, to complete the peptide extraction added 100% ACN sufficient to cover gel pieces, incubated at RT for 10 min in an orbital shaker. The tubes were once more spun down and the supernatant was pooled with the supernatant from the previous step. The pooled supernatant was dried down by spinning tubes in a speedvac vacuum concentrator and stored in -80°C till use. The resulting tryptic peptides were extracted using 0.1% TFA and vacuum dried and dissolved in 5µl of TA buffer (**Fig. 3.1.2)**.


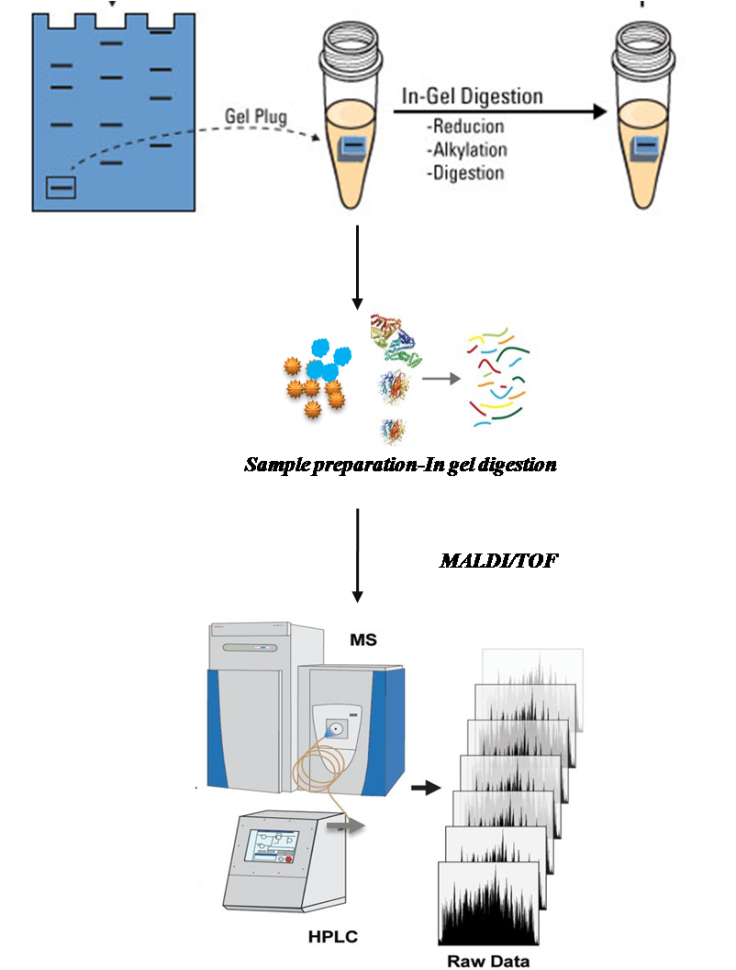


**Fig. 3.1.2 Strategy for MALDI-TOF/TOF MS experiment**

**Matrix-Assisted Laser Desorption /Ionization-Time of Flight /Time of Flight Mass Spectrometry (MALDI-TOF/TOF MS)**

The peptides obtained were mixed with HCCA (α-Cyano-4-hydroxycinnamic acid) matrix (5 mg/ml α-Cyano- 4-hydroxycinnamic acid in 1:2 ratio of 0.1% TFA and 100% ACN) in 1:1 ratio (1.5 µl of the sample was mixed with 1.5 µl of HCCA matrix) and the resulting 3μl was spotted onto the MALDI plate, MTP 384 ground steel (Bruker Daltonics, Germany). After air-drying the sample, it was analyzed on the MALDI TOF/TOF UltraflexIII instrument (Bruker Daltonics, Germany). External calibration was done with standard peptide (PEPMIX Mixture) supplied by Bruker, with masses ranging from 16107 to 509304 Da. Further analysis was done with Flex Analysis Software (Version 3.3) in reflectron ion mode with an average of 500 laser shots at mass detection range between 500 to 5000 *m/z* for obtaining the spectra. The masses obtained in the spectra were submitted for peptide mass fingerprinting using a MASCOT search.

**MALDI-TOF analyses**

A peptide mass fingerprint (pmf) search using Mascot database search on its server was conducted to identify the protein in the bands obtained from the western blot assays. The UniProt database 20190127 for *Bos taurus* (Accessed 25 Jan 2021) was used and Trypsin was used as the enzyme for generating the *in silico* peptides. The carbamidomethylation of the cysteine residues was considered as the fixed modification and the oxidation of the methionine residues was considered as the variable modification for the search. The error window on the experimental peptide mass values i.e. the peptide mass tolerance of ±0.75 Da and a unitary missed cleavage were used as parameters of the Mascot database search. Additionally, only the +1 peptide charged state (Mass Value) i.e. the monoisotopic experimental mass values were considered for the database search while the no restrictions on protein mass were put. The decoy search was not included in the performed searches because in a small dataset the number of matches is too small to give an accurate estimate.
